# Supplementary material for: Two’s company, three’s a crowd: population density and food availability affect katydid courtship
Source: Research Square preprint supplement (doi:10.21203/rs.3.rs-7448537/v1), 2025-11-21
Supplement: Supplementary file 1 [file 926c69b4676d7cc57c25a981.docx]

***Katydid 2023 Code***

ANOVA: (F1,11 = 7.89, P = 0.017)

Wilcoxon signed-ranks test: (T = 6, N = 14, P < 0.01)

The significance of regressions should be tested with F or t but not the correlation coefficient r. R

2 should be quoted with both regressions and parametric analyses (t =, R2 =, P = )

of variance.

Multiple linear regression was used to test if [predictor variable 1], [predictor variable 2], … significantly predicted [response variable].

The fitted regression model was: [fitted regression equation]

The overall regression was statistically significant (R2 = [R2 value], F(df regression, df residual) = [F-value], p = [p-value]).

It was found that [predictor variable 1] significantly predicted [response variable] (β = [β-value], p = [p-value]).

It was found that [predictor variable 2] did not significantly predict [response variable] (β = [β-value], p = [p-value]).

R version 4.2.2 (2022-10-31)

> Katydid.23.Stats <- read.csv("~/Downloads/Katydid 23 Stats.csv")

> View(Katydid.23.Stats)

> katydid <- read.csv("~/Downloads/Katydid 23 Stats.csv")

> View(katydid)

> male = katydid[which(katydid$sex=='male'),]

1. **Effects on Male Call Rate**

**Effects of Movement Rate, Diet, Approaches, and Group Size on Call Rate**

> model9<-lm(call.rate~move.rate*diet*approach*group.size, data=male)

> summary(model9)

Call:

lm(formula = call.rate ~ move.rate * diet * approach * group.size,

data = male)

Residuals:

Min 1Q Median 3Q Max

-2.7728 -0.3087 -0.0834 0.0994 5.0272

Coefficients: (1 not defined because of singularities)

Estimate Std. Error

(Intercept) 8.1179 3.0532

move.rate -15.6003 11.6279

dietlow -8.2686 3.2841

approach -7.4566 6.8042

group.size -0.8909 0.4440

move.rate:dietlow 12.8991 14.7892

move.rate:approach 12.8402 11.4292

dietlow:approach 6.4051 6.7698

move.rate:group.size 1.6732 1.2081

dietlow:group.size 0.9689 0.4756

approach:group.size 0.8572 0.9089

move.rate:dietlow:approach -3.9958 3.8000

move.rate:dietlow:group.size -1.3812 1.5978

move.rate:approach:group.size -1.4409 1.4901

dietlow:approach:group.size -0.6743 0.8692

move.rate:dietlow:approach:group.size NA NA

t value Pr(>|t|)

(Intercept) 2.659 0.0151 *

move.rate -1.342 0.1948

dietlow -2.518 0.0204 *

approach -1.096 0.2862

group.size -2.006 0.0585 .

move.rate:dietlow 0.872 0.3935

move.rate:approach 1.123 0.2745

dietlow:approach 0.946 0.3554

move.rate:group.size 1.385 0.1813

dietlow:group.size 2.037 0.0551 .

approach:group.size 0.943 0.3569

move.rate:dietlow:approach -1.052 0.3055

move.rate:dietlow:group.size -0.864 0.3976

move.rate:approach:group.size -0.967 0.3451

dietlow:approach:group.size -0.776 0.4470

move.rate:dietlow:approach:group.size NA NA

---

Signif. codes: 0 ‘***’ 0.001 ‘**’ 0.01 ‘*’ 0.05 ‘.’ 0.1 ‘ ’ 1

Residual standard error: 1.687 on 20 degrees of freedom

Multiple R-squared: 0.3808, Adjusted R-squared: -0.05268

F-statistic: 0.8785 on 14 and 20 DF, p-value: 0.5905

***Diet has an effect on call rate and the interaction between diet and group size has a marginal effect on call rate- assumptions violated, confirm in later tests.***

**Effect of Group Size and Diet on Call Rate**

> model10<-lm(call.rate~group.size*diet, data=male)

> summary(model10)

Call:

lm(formula = call.rate ~ group.size * diet, data = male)

Residuals:

Min 1Q Median 3Q Max

-2.6842 -0.5420 -0.2491 0.2179 6.0866

Coefficients:

Estimate Std. Error t value Pr(>|t|)

(Intercept) 3.6551 1.2490 2.926 0.00637 **expected response for high diet group

group.size -0.3236 0.1500 -2.158 0.03881 * effect of group size on high diet

dietlow -3.9085 1.5790 -2.475 0.01898 * difference between low and high diet group

group.size:dietlow 0.4074 0.1990 2.047 0.04925 * difference in slope between low and high diet group

(Could plug in different values to compare a value for different group or look at R package)

---

Signif. codes: 0 ‘***’ 0.001 ‘**’ 0.01 ‘*’ 0.05 ‘.’ 0.1 ‘ ’ 1

Residual standard error: 1.551 on 31 degrees of freedom

Multiple R-squared: 0.1885, Adjusted R-squared: 0.1099

F-statistic: 2.4 on 3 and 31 DF, p-value: 0.08675

> ggplot(male, aes(group.size, call.rate, color = diet)) +geom_point() +labs(y = "Call Rate (calls/min.)", x = "Group Size") +geom_smooth(mapping = aes(fill = diet), method = "lm", se = TRUE) +theme_classic() +theme(text = element_text(family = "Times New Roman")) +scale_color_manual(values = c("forestgreen", "gray35"), name = "Diet") +scale_fill_manual(values = c("forestgreen", "gray35"), name = "Diet") +scale_x_continuous(breaks = seq(0, 12, by = 3))

**
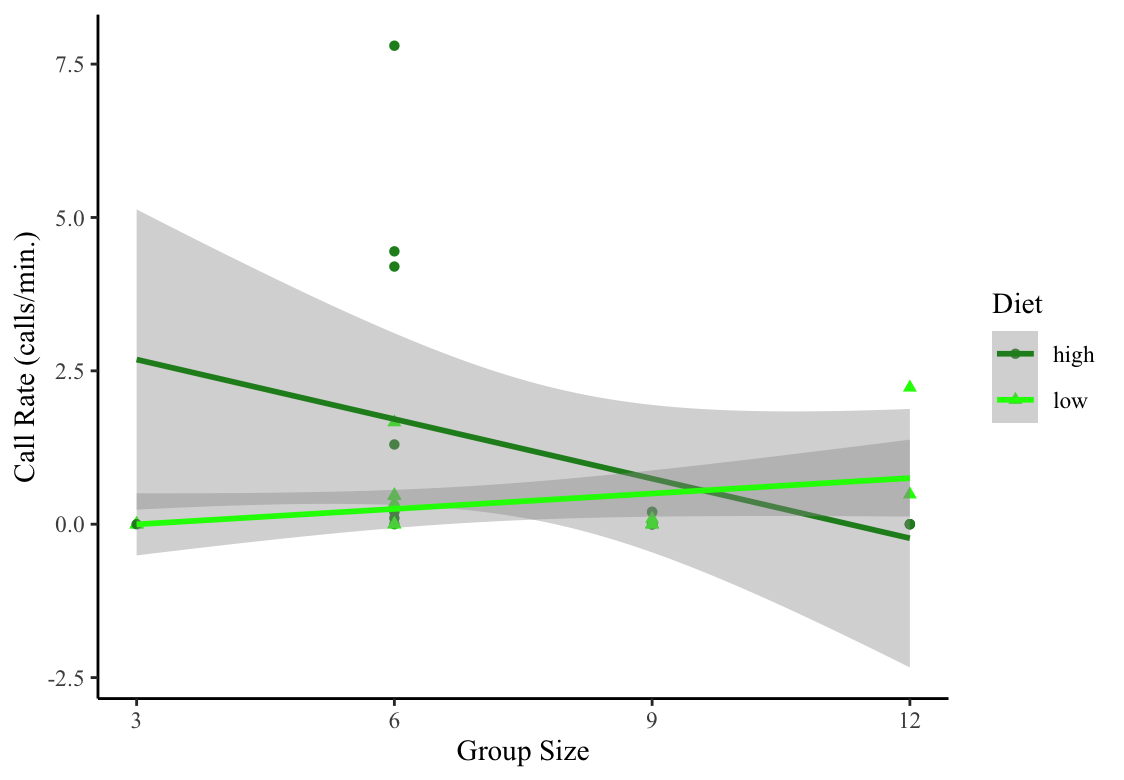
**

***There is an effect of group size on call rate, diet on call rate, and interaction of group size and diet on call rate. Log+1 and log were performed to make data normal since Shapiro and Fligner both came out violating paramaters but no difference in results was found.***

***Multiple linear regression was used to test if group size and diet significantly predicted male call rate. The fitted regression model was:***

***Call Rate = 3.66 – 0.32(Group Size) – 3.91(Diet) + 0.41(Group Size) (Diet)***

***The overall regression was marginally significant (R^2 = 0.1099, F(3,31) = 2.4, p = 0.087). It was found that group size significantly predicted call rate (B = -0.32, p = 0.039). It was found that diet significantly predicted call rate as well (B = -3.91, p = 0.019). The interaction between group size and diet also predicted call rate (B = 0.42, p = 0.05).***

**Linear Model Group Size on Call Rate**

> model5 <-lm(call.rate~group.size, data=male)

> summary(model5)

Call:

lm(formula = call.rate ~ group.size, data = male)

Residuals:

Min 1Q Median 3Q Max

-0.9521 -0.7230 -0.5938 -0.3529 7.0270

Coefficients:

Estimate Std. Error t value Pr(>|t|)

(Intercept) 1.13131 0.81177 1.394 0.173

group.size -0.05972 0.10333 -0.578 0.567

Residual standard error: 1.66 on 33 degrees of freedom

Multiple R-squared: 0.01002, Adjusted R-squared: -0.01998

F-statistic: 0.334 on 1 and 33 DF, p-value: 0.5672

***No effect of group size on call rate (F(1,33) = 0.334, R^2 = 0.4075, p = 0.5672). Log+1 and log transformations were performed since assumptions were violated but results were not changed.***

**T-Test of Effect of Diet on Call Rate**

> high=male[which(male$diet=='high'),]

> low=male[which(male$diet=='low'),]

> shapiro.test(high$call.rate)

Shapiro-Wilk normality test

data: high$call.rate

W = 0.56496, p-value = 4.859e-06

> wilcox.test(male$call.rate~male$diet)

Wilcoxon rank sum test with continuity

correction

data: male$call.rate by male$diet

W = 167.5, p-value = 0.6085

alternative hypothesis: true location shift is not equal to 0

> ggplot(data=male, aes(diet, call.rate, color=diet)) +geom_point() +geom_boxplot() +theme_classic() +scale_color_manual(values = c("forestgreen", "green")) + theme(text=element_text(family = "Times New Roman")) +geom_jitter(width=0.2, height=0.3)+labs(y= "Call Rate (call/min.)", x = "Diet", color = "Diet")


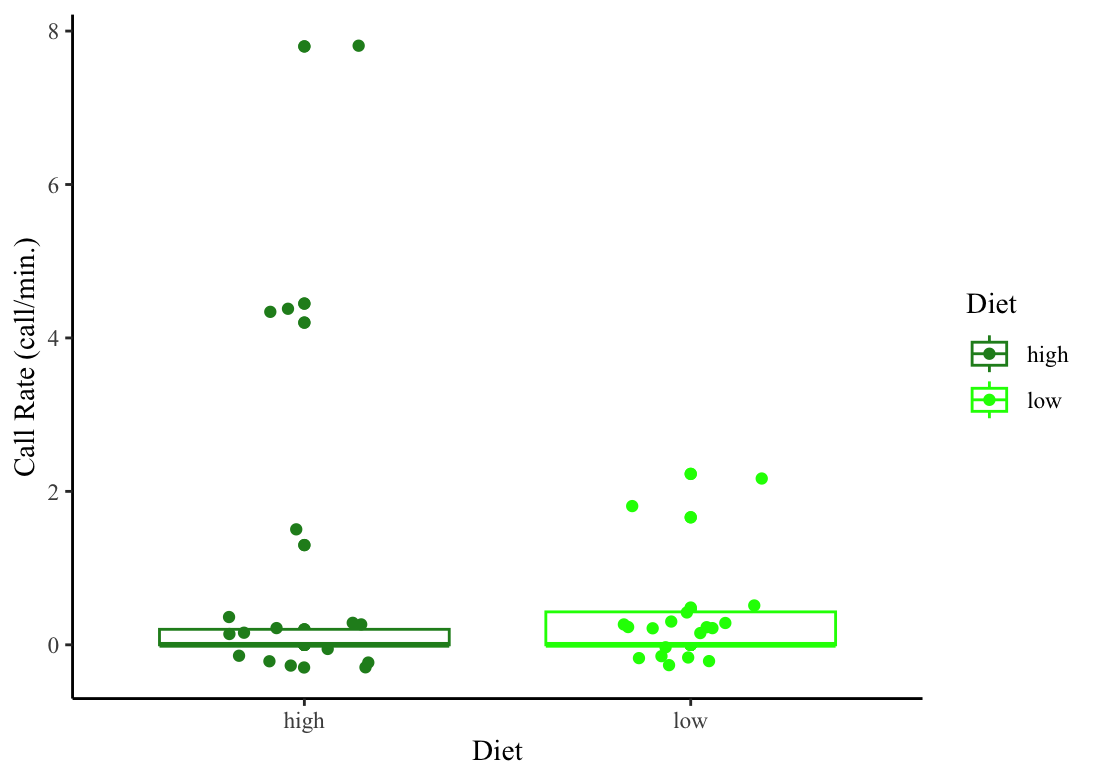


***No effect of diet on call rate (W = 167.5, n = 35, p = 0.6085).***

1. **Effects on Movement Rate**

**Effect of Group Size, Diet, Sex, and Approaches on Movement Rate**

> model7<-lm(move.rate~group.size*diet*sex*approach, data=katydid)

> plot(model7)

Hit <Return> to see next plot:

Hit <Return> to see next plot:

Hit <Return> to see next plot:

Hit <Return> to see next plot:

Warning message:

not plotting observations with leverage one:

18

> summary(model7)

Call:

lm(formula = move.rate ~ group.size * diet * sex * approach,

data = katydid)

Residuals:

Min 1Q Median 3Q Max

-0.41132 -0.10961 -0.01031 0.12868 0.73881

Coefficients: (4 not defined because of singularities)

Estimate Std. Error t value

(Intercept) 0.471034 0.169431 2.780

group.size -0.040158 0.019271 -2.084

dietlow 0.487328 0.266232 1.830

sexmale -0.994489 0.280360 -3.547

approach 0.309067 0.373381 0.828

group.size:dietlow -0.055926 0.034021 -1.644

group.size:sexmale 0.129119 0.034066 3.790

dietlow:sexmale NA NA NA

group.size:approach -0.016408 0.057768 -0.284

dietlow:approach -0.174384 0.536848 -0.325

sexmale:approach 0.382832 0.453042 0.845

group.size:dietlow:sexmale NA NA NA

group.size:dietlow:approach -0.004265 0.081520 -0.052

group.size:sexmale:approach -0.037849 0.062786 -0.603

dietlow:sexmale:approach NA NA NA

group.size:dietlow:sexmale:approach NA NA NA

Pr(>|t|)

(Intercept) 0.007905 **

group.size 0.042878 *

dietlow 0.073808 .

sexmale 0.000924 ***

approach 0.412179

group.size:dietlow 0.107174

group.size:sexmale 0.000445 ***

dietlow:sexmale NA

group.size:approach 0.777683

dietlow:approach 0.746816

sexmale:approach 0.402567

group.size:dietlow:sexmale NA

group.size:dietlow:approach 0.958507

group.size:sexmale:approach 0.549649

dietlow:sexmale:approach NA

group.size:dietlow:sexmale:approach NA

---

Signif. codes: 0 ‘***’ 0.001 ‘**’ 0.01 ‘*’ 0.05 ‘.’ 0.1 ‘ ’ 1

Residual standard error: 0.2217 on 45 degrees of freedom

Multiple R-squared: 0.5904, Adjusted R-squared: 0.4903

F-statistic: 5.898 on 11 and 45 DF, p-value: 7.867e-06

> summary.aov(model7)

Df Sum Sq Mean Sq F value Pr(>F)

group.size 1 0.0147 0.0147 0.300 0.58688

diet 1 0.0083 0.0083 0.170 0.68243

sex 1 0.0061 0.0061 0.123 0.72711

approach 1 2.1900 2.1900 44.538 3.11e-08 ***

group.size:diet 1 0.1330 0.1330 2.704 0.10706

group.size:sex 1 0.5373 0.5373 10.927 0.00187 **

group.size:approach 1 0.1520 0.1520 3.091 0.08553 .

diet:approach 1 0.0788 0.0788 1.603 0.21199

sex:approach 1 0.0512 0.0512 1.041 0.31308

group.size:diet:approach 1 0.0008 0.0008 0.015 0.90153

group.size:sex:approach 1 0.0179 0.0179 0.363 0.54965

Residuals 45 2.2128 0.0492

---

Signif. codes: 0 ‘***’ 0.001 ‘**’ 0.01 ‘*’ 0.05 ‘.’ 0.1 ‘ ’ 1

**Group size and sex independently have effects on movement rate. The interaction between group size and sex have an effect on movement rate. Diet has a marginal effect on movement rate. Approach has an effect on movement rate. Assumptions violated, confirm with later tests.**

**Effect of Group Size, and Sex on Movement Rate**

model6<-lm(move.rate~diet*group.size*sex, data=katydid)

> summary(model6)

Call:

lm(formula = move.rate ~ group.size * sex, data = katydid)

Residuals:

Min 1Q Median 3Q Max

-0.50100 -0.18710 -0.08772 0.14552 0.74452

Coefficients:

Estimate Std. Error t value Pr(>|t|)

(Intercept) 0.71969 0.18748 3.839 0.000332 ***

group.size -0.05918 0.02282 -2.593 0.012263 *

sexmale -0.76972 0.23356 -3.296 0.001756 **

group.size:sexmale 0.10510 0.02890 3.637 0.000625 ***

---

Signif. codes: 0 ‘***’ 0.001 ‘**’ 0.01 ‘*’ 0.05 ‘.’ 0.1 ‘ ’ 1

Residual standard error: 0.2849 on 53 degrees of freedom

Multiple R-squared: 0.2038, Adjusted R-squared: 0.1588

F-statistic: 4.523 on 3 and 53 DF, p-value: 0.006751

> ggplot(katydid, aes(group.size, move.rate, color = sex)) +geom_point() +labs(y = "Proportion of Time Spent Moving", x = "Group Size") +geom_smooth(mapping = aes(fill = sex), method = "lm", se = TRUE) +theme_classic() +theme(text = element_text(family = "Times New Roman")) +scale_color_manual(values = c("forestgreen", "gray35"), name = "Sex") +scale_fill_manual(values = c("forestgreen", "gray35"), name = "Sex") +scale_x_continuous(breaks = seq(0, 12, by = 3))


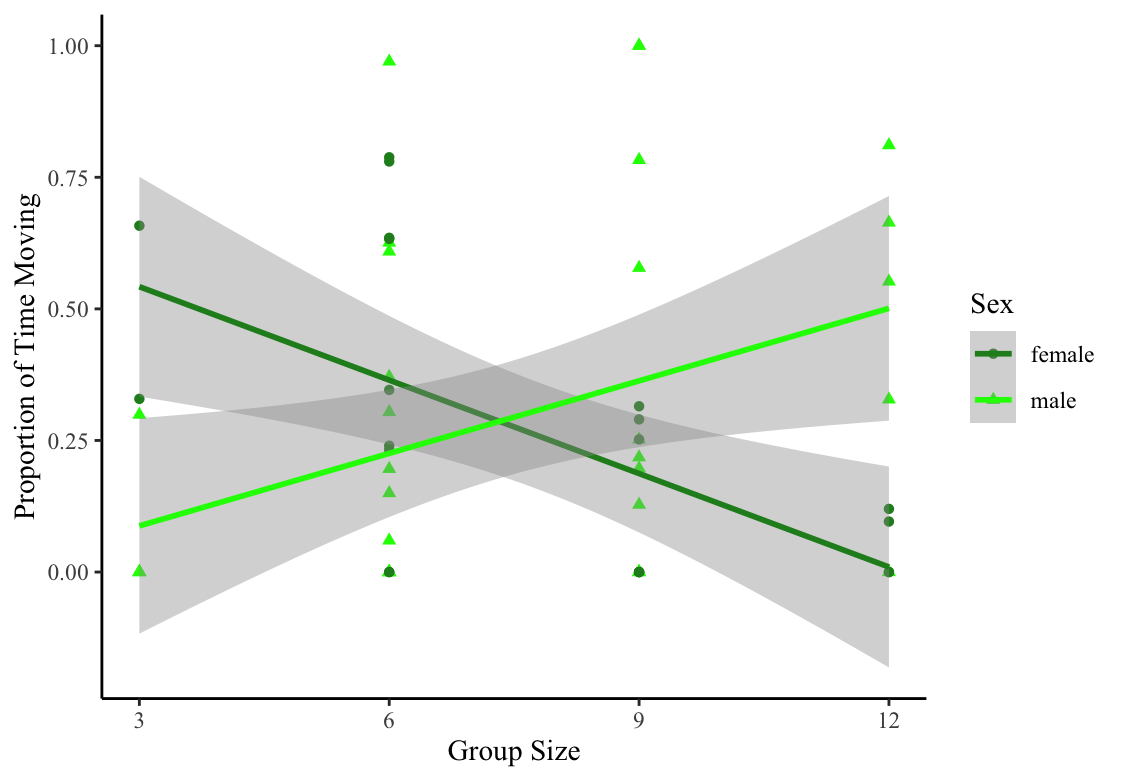


***The interaction between group size and sex have a significant effect on movement rate. Data was transformed by log(x+1) to meet assumptions.***

***Multiple linear regression was used to test if group size and sex significantly predicted movement rate. The fitted regression model was:***

***Movement Rate = 0.72 – 0.06(Group Size) – 0.77(Sex) - 0.77(Group Size) (Sex)***

***The overall regression was marginally significant (R^2 = 0.1588, F(3,53) = 4.523, p = 0.007). It was found that group size significantly predicted movement rate (B = -0.06, p = 0.01). It was found that sex significantly predicted movement rate as well (B = -0.77, p = 0.002). The interaction between group size and sex also predicted movement rate (B = 0.11, p = 0.0006).***

**Linear Model of Group Size on Movement Rate**

> model9<-lm(move.rate~group.size, data=male)

> summary(model9)

Call:

lm(formula = move.rate ~ group.size, data = male)

Residuals:

Min 1Q Median 3Q Max

-0.50100 -0.22548 -0.08772 0.18714 0.74452

Coefficients:

Estimate Std. Error t value Pr(>|t|)

(Intercept) -0.05003 0.15356 -0.326 0.747

group.size 0.04592 0.01955 2.349 0.025 *

---

Signif. codes: 0 ‘***’ 0.001 ‘**’ 0.01 ‘*’ 0.05 ‘.’ 0.1 ‘ ’ 1

Residual standard error: 0.3141 on 33 degrees of freedom

Multiple R-squared: 0.1433, Adjusted R-squared: 0.1173

F-statistic: 5.519 on 1 and 33 DF, p-value: 0.02495

> summary.aov(model9)

Df Sum Sq Mean Sq F value Pr(>F)

group.size 1 0.544 0.5444 5.519 0.025 *

Residuals 33 3.255 0.0986

---

Signif. codes: 0 ‘***’ 0.001 ‘**’ 0.01 ‘*’ 0.05 ‘.’ 0.1 ‘ ’ 1

> model8<-lm(move.rate~group.size, data=katydid)

> shapiro.test(resid(model8))

Shapiro-Wilk normality test

data: resid(model8)

W = 0.84812, p-value = 4.325e-06

> model8<-lm(log(move.rate+1)~group.size, data=katydid)

> summary(model8)

Call:

lm(formula = log(move.rate + 1) ~ group.size, data = katydid)

Residuals:

Min 1Q Median 3Q Max

-0.23688 -0.21183 -0.03285 0.20266 0.46879

Coefficients:

Estimate Std. Error t value Pr(>|t|)

(Intercept) 0.186776 0.089982 2.076 0.0426 *

group.size 0.004176 0.011252 0.371 0.7120

---

Signif. codes:

0 ‘***’ 0.001 ‘**’ 0.01 ‘*’ 0.05 ‘.’ 0.1 ‘ ’ 1

Residual standard error: 0.2296 on 55 degrees of freedom

Multiple R-squared: 0.002497, Adjusted R-squared: -0.01564

F-statistic: 0.1377 on 1 and 55 DF, p-value: 0.712

***I found no effect of group size on movement rate (F(1,55) = 0.1377, R^2 = 0.002, p = 0.712). I transformed the with log(x +1) to meet assumptions for the test.***

**T-Test of Effect of Sex on Movement Rate**

> female=katydid[which(katydid$sex=='female'),]

> shapiro.test(female$move.rate)

Shapiro-Wilk normality test

data: female$move.rate

W = 0.83903, p-value = 0.002185

>wilcox.test(katydid$move.rate~katydid$sex)

Wilcoxon rank sum test with continuity correction

data: katydid$move.rate by katydid$sex

W = 386.5, p-value = 0.9865

alternative hypothesis: true location shift is not equal to 0

> ggplot(data=katydid, aes(sex, move.rate, color=sex))+geom_point()+geom_boxplot()+ theme_classic() +scale_color_manual(values = c("forestgreen", "green")) + theme(text=element_text(family = "Times New Roman")) +geom_jitter(width=0.2, height=0.3) +labs(y= "Proportion of Time Moving", x = "Sex", color = "Sex")


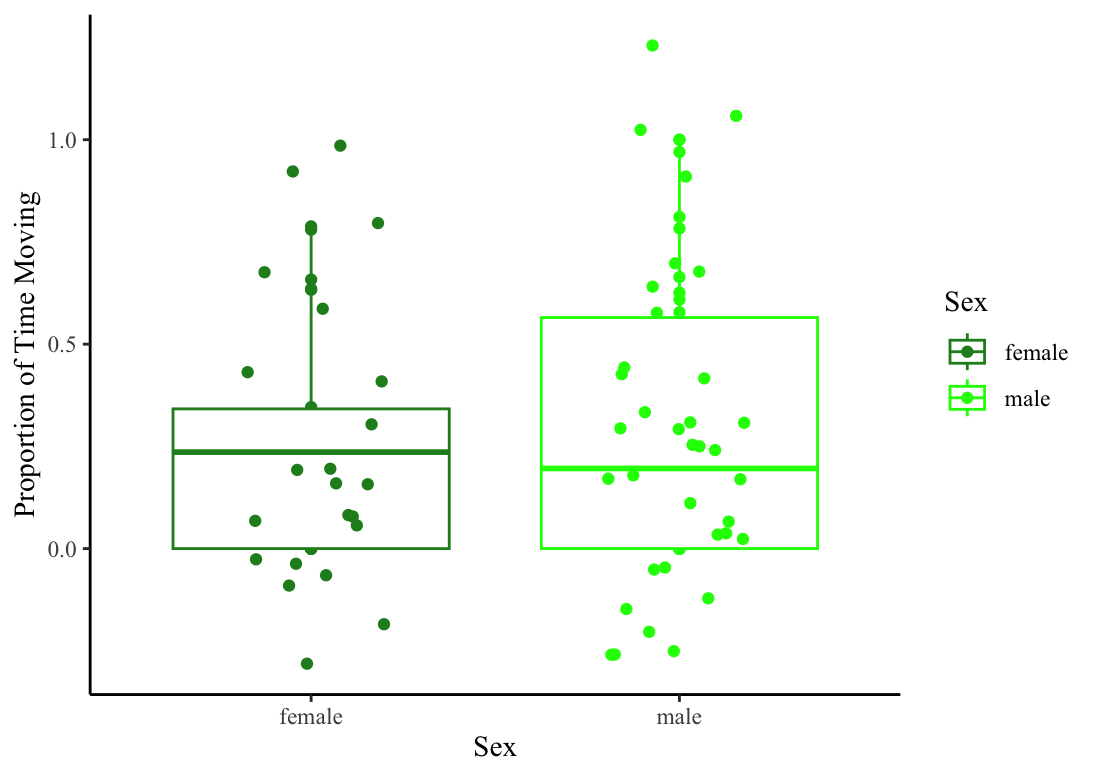


***I found sex to have no effect on movement rate (W = 386.5, n = 57, p = 0.9865).***

**T-Test Effect of Diet on Movement Rate**

> high=katydid[which(katydid$diet=='high'),]

> shapiro.test(high$move.rate)

Shapiro-Wilk normality test

data: high$move.rate

W = 0.83232, p-value = 4.193e-05

> wilcox.test(katydid$move.rate~katydid$diet)

Wilcoxon rank sum test with continuity correction

data: katydid$move.rate by katydid$diet

W = 355, p-value = 0.9506

alternative hypothesis: true location shift is not equal to 0

***I found diet to have no effect on movement rate (W = 355, n = 57, p = 0.9506).***

1. **Effects on Approaches**

**Effect of Movement Rate, Diet, Group Size, and Sex on Approaches**

> model8<-lm(approach~move.rate*diet*group.size*sex, data=katydid)

> summary(model8)

Call:

lm(formula = approach ~ move.rate * diet * group.size * sex,

data = katydid)

Residuals:

Min 1Q Median 3Q Max

-1.28616 -0.34252 -0.01554 0.19902 2.44650

Coefficients: (4 not defined because of singularities)

Estimate

(Intercept) 0.44387

move.rate -1.39877

dietlow -0.38902

group.size -0.05685

sexmale -0.38137

move.rate:dietlow 9.33953

move.rate:group.size 0.53847

dietlow:group.size 0.05719

move.rate:sexmale 3.11465

dietlow:sexmale NA

group.size:sexmale 0.04902

move.rate:dietlow:group.size -1.24108

move.rate:dietlow:sexmale NA

move.rate:group.size:sexmale -0.48255

dietlow:group.size:sexmale NA

move.rate:dietlow:group.size:sexmale NA

Std. Error

(Intercept) 0.84474

move.rate 2.31369

dietlow 1.22703

group.size 0.09250

sexmale 1.39922

move.rate:dietlow 3.85495

move.rate:group.size 0.34634

dietlow:group.size 0.17314

move.rate:sexmale 4.02770

dietlow:sexmale NA

group.size:sexmale 0.18261

move.rate:dietlow:group.size 0.45725

move.rate:dietlow:sexmale NA

move.rate:group.size:sexmale 0.50658

dietlow:group.size:sexmale NA

move.rate:dietlow:group.size:sexmale NA

t value

(Intercept) 0.525

move.rate -0.605

dietlow -0.317

group.size -0.615

sexmale -0.273

move.rate:dietlow 2.423

move.rate:group.size 1.555

dietlow:group.size 0.330

move.rate:sexmale 0.773

dietlow:sexmale NA

group.size:sexmale 0.268

move.rate:dietlow:group.size -2.714

move.rate:dietlow:sexmale NA

move.rate:group.size:sexmale -0.953

dietlow:group.size:sexmale NA

move.rate:dietlow:group.size:sexmale NA

Pr(>|t|)

(Intercept) 0.60185

move.rate 0.54850

dietlow 0.75267

group.size 0.54191

sexmale 0.78644

move.rate:dietlow 0.01949 *

move.rate:group.size 0.12701

dietlow:group.size 0.74272

move.rate:sexmale 0.44338

dietlow:sexmale NA

group.size:sexmale 0.78957

move.rate:dietlow:group.size 0.00938 **

move.rate:dietlow:sexmale NA

move.rate:group.size:sexmale 0.34590

dietlow:group.size:sexmale NA

move.rate:dietlow:group.size:sexmale NA

---

Signif. codes:

0 ‘***’ 0.001 ‘**’ 0.01 ‘*’ 0.05 ‘.’ 0.1 ‘ ’ 1

Residual standard error: 0.7305 on 45 degrees of freedom

Multiple R-squared: 0.6231, Adjusted R-squared: 0.531

F-statistic: 6.764 on 11 and 45 DF, p-value: 1.515e-06

> summary.aov(model8)

Df Sum Sq Mean Sq F value

move.rate 1 25.967 25.967 48.659

diet 1 0.044 0.044 0.082

group.size 1 0.077 0.077 0.145

sex 1 0.081 0.081 0.151

move.rate:diet 1 0.170 0.170 0.319

move.rate:group.size 1 0.581 0.581 1.088

diet:group.size 1 2.893 2.893 5.422

move.rate:sex 1 0.533 0.533 0.999

group.size:sex 1 0.088 0.088 0.166

move.rate:diet:group.size 1 8.787 8.787 16.467

move.rate:group.size:sex 1 0.484 0.484 0.907

Residuals 45 24.014 0.534

Pr(>F)

move.rate 1.11e-08 ***

diet 0.775855

group.size 0.705485

sex 0.699109

move.rate:diet 0.575038

move.rate:group.size 0.302526

diet:group.size 0.024439 *

move.rate:sex 0.322902

group.size:sex 0.685946

move.rate:diet:group.size 0.000195 ***

move.rate:group.size:sex 0.345899

Residuals

---

Signif. codes:

0 ‘***’ 0.001 ‘**’ 0.01 ‘*’ 0.05 ‘.’ 0.1 ‘ ’ 1

> ggplot(katydid, aes(move.rate,approach, color=diet, shape=diet))+

+ geom_point()+

+ ylab("Number of Approaches") +

+ xlab("Movement Rate")+ geom_smooth(method=lm)+geom_point(size=2.5)+theme_classic()

***Movement rate independently has an effect on approaches, the interaction between diet and group size has an effect on approaches, and the interaction between movement rate and diet and group size has an effect on approaches. Fligner okay.***

**Effect of Group Size and Diet on Approaches**

> model5<-lm(approach~group.size*diet, data=katydid)

> shapiro.test(resid(model5))

Shapiro-Wilk normality test

data: resid(model5)

W = 0.70411, p-value = 2.032e-09

> model5<-lm(log(approach+1)~(log(move.rate+1))*group.size*diet, data=katydid)

> model5<-lm(log(approach+1)~group.size*diet, data=katydid)

> shapiro.test(resid(model5))

Shapiro-Wilk normality test

data: resid(model5)

W = 0.72017, p-value = 4.164e-09

> model5<-lm(log(approach+1)~(log(group.size)*diet, data=katydid)

Error: unexpected ',' in "model5<-lm(log(approach+1)~(log(group.size)*diet,"

> model5<-lm(log(approach+1)~(log(group.size))*diet, data=katydid)

> shapiro.test(resid(model5))

Shapiro-Wilk normality test

data: resid(model5)

W = 0.69216, p-value = 1.211e-09

> model5<-lm(approach~(log(group.size))*diet, data=katydid)

> shapiro.test(resid(model5))

Shapiro-Wilk normality test

data: resid(model5)

W = 0.66669, p-value = 4.19e-10

> model5<-lm(log(approach+1)~(log(group.size))*diet, data=katydid)

> summary(model5)

Call:

lm(formula = log(approach + 1) ~ (log(group.size)) * diet, data = katydid)

Residuals:

Min 1Q Median 3Q Max

-0.3413 -0.3295 -0.3128 0.3637 1.2933

Coefficients:

Estimate Std. Error t value Pr(>|t|)

(Intercept) 0.23898 0.45368 0.527 0.601

log(group.size) 0.04119 0.22331 0.184 0.854

dietlow 0.03923 0.67777 0.058 0.954

log(group.size):dietlow -0.02003 0.34844 -0.057 0.954

Residual standard error: 0.5133 on 53 degrees of freedom

Multiple R-squared: 0.0007766, Adjusted R-squared: -0.05578

F-statistic: 0.01373 on 3 and 53 DF, p-value: 0.9978

***There is no significant effect of the interaction between group size and diet on approaches.***

**Linear Model of Movement Rate on Number of Approaches**

> model7<-lm(approach~move.rate, data=katydid)

> summary(model7)

Call:

lm(formula = approach ~ move.rate, data = katydid)

Residuals:

Min 1Q Median 3Q Max

-2.18071 -0.37614 0.01158 0.19824 2.67648

Coefficients:

Estimate Std. Error t value Pr(>|t|)

(Intercept) -0.01158 0.14770 -0.078 0.938

move.rate 2.19229 0.35644 6.151 9.18e-08 ***

---

Signif. codes: 0 ‘***’ 0.001 ‘**’ 0.01 ‘*’ 0.05 ‘.’ 0.1 ‘ ’ 1

Residual standard error: 0.8285 on 55 degrees of freedom

Multiple R-squared: 0.4075, Adjusted R-squared: 0.3967

F-statistic: 37.83 on 1 and 55 DF, p-value: 9.181e-08

> cor.test(katydid$move.rate,katydid$approach, method=c("spearman"))

Spearman's rank correlation rho

data: katydid$move.rate and katydid$approach

S = 9748.8, p-value = 4.472e-09

alternative hypothesis: true rho is not equal to 0

sample estimates:

rho

0.6840549

Warning message:

In cor.test.default(katydid$move.rate, katydid$approach, method = c("spearman")) :

Cannot compute exact p-value with ties

> ggplot(katydid, aes(x = move.rate, y = approach)) +geom_point(color = "forestgreen") +geom_smooth(color = "forestgreen", method="lm", se = TRUE, fill="forestgreen") +theme_classic() +labs(x = "Proportion of Time Moving", y = "Number of Approaches") +theme(text = element_text(family = "Times New Roman"))

***
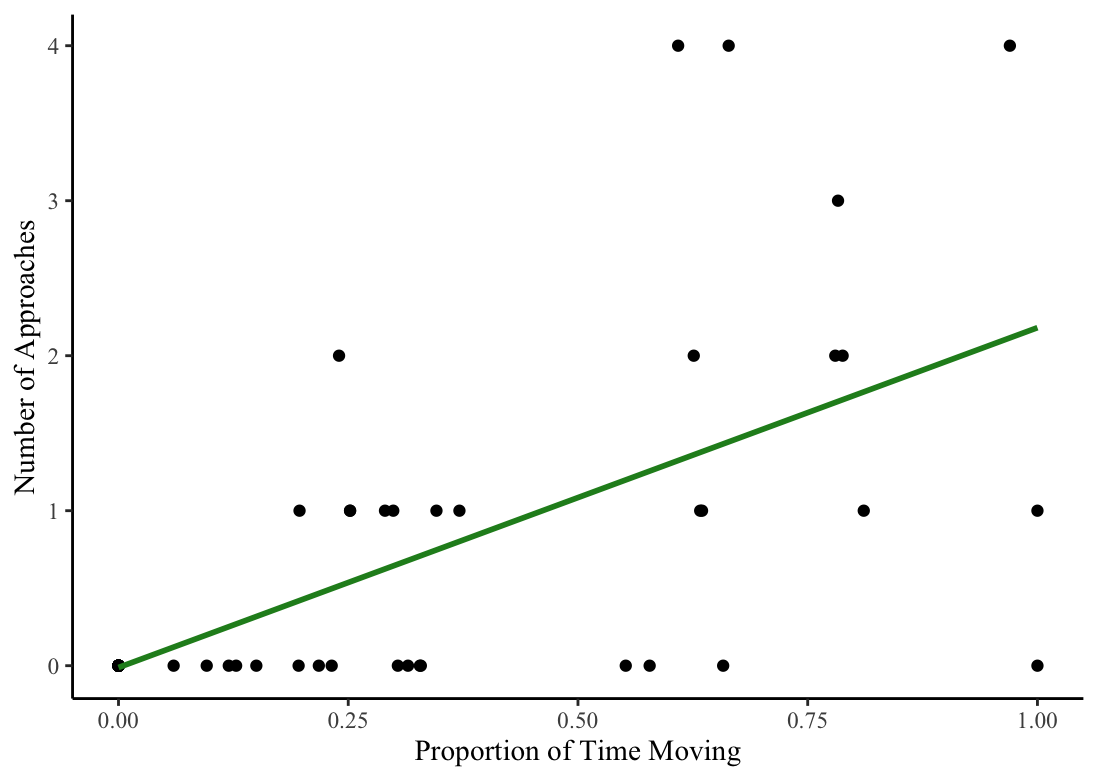
***

***The results of the regression indicated that movement rate explained 40.8% of the variation of number of approaches (F(1,55) = 37.83, p < 0.0001).***

***Diet Treatment Graphs***

> weight <- read.csv("~/Downloads/Applied Statistics/weight.csv")

> View(weight)

> trial<- lm(X47W~day, data=weight)

> summary(trial)

Call:

lm(formula = X47W ~ day, data = weight)

Residuals:

Min 1Q Median 3Q Max

-0.149175 -0.063847 0.004095 0.043565 0.153485

Coefficients:

Estimate Std. Error t value Pr(>|t|)

(Intercept) 0.533636 0.027049 19.728 < 2e-16 ***

day 0.004888 0.001138 4.294 0.000169 ***

---

Signif. codes:

0 ‘***’ 0.001 ‘**’ 0.01 ‘*’ 0.05 ‘.’ 0.1 ‘ ’ 1

Residual standard error: 0.07381 on 30 degrees of freedom

(6 observations deleted due to missingness)

Multiple R-squared: 0.3806, Adjusted R-squared: 0.36

F-statistic: 18.44 on 1 and 30 DF, p-value: 0.0001693

> trial2<- lm(X45W~day, data=weight)

> summary(trial2)

Call:

lm(formula = X45W ~ day, data = weight)

Residuals:

Min 1Q Median 3Q Max

-0.15828 -0.03462 0.01697 0.06124 0.09628

Coefficients:

Estimate Std. Error t value Pr(>|t|)

(Intercept) 0.629101 0.026035 24.164 <2e-16 ***

day 0.001508 0.001119 1.348 0.187

---

Signif. codes:

0 ‘***’ 0.001 ‘**’ 0.01 ‘*’ 0.05 ‘.’ 0.1 ‘ ’ 1

Residual standard error: 0.07359 on 32 degrees of freedom

(4 observations deleted due to missingness)

Multiple R-squared: 0.05372, Adjusted R-squared: 0.02415

F-statistic: 1.817 on 1 and 32 DF, p-value: 0.1872

> trial2<- lm(X37R~day, data=weight)

> summary(trial2)

Call:

lm(formula = X37R ~ day, data = weight)

Residuals:

Min 1Q Median 3Q Max

-0.084843 -0.025765 0.008412 0.032863 0.061137

Coefficients:

Estimate Std. Error t value Pr(>|t|)

(Intercept) 0.702176 0.065179 10.773 1.86e-08 ***

day -0.002275 0.002144 -1.061 0.306

---

Signif. codes:

0 ‘***’ 0.001 ‘**’ 0.01 ‘*’ 0.05 ‘.’ 0.1 ‘ ’ 1

Residual standard error: 0.04331 on 15 degrees of freedom

(21 observations deleted due to missingness)

Multiple R-squared: 0.06978, Adjusted R-squared: 0.007764

F-statistic: 1.125 on 1 and 15 DF, p-value: 0.3056

> trial3<- lm(X30W~day, data=weight)

> summary(trial3)

Call:

lm(formula = X30W ~ day, data = weight)

Residuals:

Min 1Q Median 3Q Max

-0.102199 -0.026853 0.005905 0.023489 0.070969

Coefficients:

Estimate Std. Error t value Pr(>|t|)

(Intercept) 0.6081256 0.0144904 41.968 <2e-16 ***

day -0.0002618 0.0006339 -0.413 0.682

---

Signif. codes:

0 ‘***’ 0.001 ‘**’ 0.01 ‘*’ 0.05 ‘.’ 0.1 ‘ ’ 1

Residual standard error: 0.04134 on 34 degrees of freedom

(2 observations deleted due to missingness)

Multiple R-squared: 0.004991, Adjusted R-squared: -0.02427

F-statistic: 0.1705 on 1 and 34 DF, p-value: 0.6822

> trial4<- lm(X39W~day, data=weight)

> summary(trial4)

Call:

lm(formula = X39W ~ day, data = weight)

Residuals:

Min 1Q Median 3Q Max

-0.127630 -0.041648 0.001608 0.028858 0.190051

Coefficients:

Estimate Std. Error t value Pr(>|t|)

(Intercept) 0.702514 0.023769 29.556 <2e-16 ***

day -0.002188 0.001044 -2.096 0.0436 *

---

Signif. codes:

0 ‘***’ 0.001 ‘**’ 0.01 ‘*’ 0.05 ‘.’ 0.1 ‘ ’ 1

Residual standard error: 0.06999 on 34 degrees of freedom

(2 observations deleted due to missingness)

Multiple R-squared: 0.1144, Adjusted R-squared: 0.08836

F-statistic: 4.392 on 1 and 34 DF, p-value: 0.04362

> trial5<- lm(X36R~day, data=weight)

> summary(trial5)

Call:

lm(formula = X36R ~ day, data = weight)

Residuals:

Min 1Q Median 3Q Max

-0.10998 -0.02766 -0.00875 0.02259 0.09463

Coefficients:

Estimate Std. Error t value Pr(>|t|)

(Intercept) 0.6904853 0.0852857 8.096 7.43e-07 ***

day -0.0006593 0.0028057 -0.235 0.817

---

Signif. codes:

0 ‘***’ 0.001 ‘**’ 0.01 ‘*’ 0.05 ‘.’ 0.1 ‘ ’ 1

Residual standard error: 0.05667 on 15 degrees of freedom

(21 observations deleted due to missingness)

Multiple R-squared: 0.003668, Adjusted R-squared: -0.06275

F-statistic: 0.05522 on 1 and 15 DF, p-value: 0.8174

> trial6<- lm(X39R~day, data=weight)

> summary(trial6)

Call:

lm(formula = X39R ~ day, data = weight)

Residuals:

Min 1Q Median 3Q Max

-0.06543 -0.04457 -0.01340 0.01514 0.16351

Coefficients:

Estimate Std. Error t value Pr(>|t|)

(Intercept) 0.692743 0.141357 4.901 0.000366 ***

day -0.002686 0.004451 -0.603 0.557499

---

Signif. codes:

0 ‘***’ 0.001 ‘**’ 0.01 ‘*’ 0.05 ‘.’ 0.1 ‘ ’ 1

Residual standard error: 0.06714 on 12 degrees of freedom

(24 observations deleted due to missingness)

Multiple R-squared: 0.02944, Adjusted R-squared: -0.05144

F-statistic: 0.364 on 1 and 12 DF, p-value: 0.5575

**Diet Test**

library(nlme)

> high<-mass[which(mass$diet=='high'),]

> low<-mass[which(mass$diet=='low'),]

> modela<-lme(body_mass~day, random = ~1|id, data = high)

> summary(modela)

Linear mixed-effects model fit by REML

Data: high

AIC BIC logLik

-190.5114 -180.602 99.2557

Random effects:

Formula: ~1 | id

(Intercept) Residual

StdDev: 0.01247748 0.07156604

Fixed effects: body_mass ~ day

Value Std.Error DF t-value p-value

(Intercept) 0.5943648 0.01479874 85 40.16320 0

day 0.0025564 0.00048657 85 5.25393 0

Correlation:

(Intr)

day -0.729

Standardized Within-Group Residuals:

Min Q1 Med Q3 Max

-2.1436933 -0.6177281 0.1213655 0.7408160 1.9992256

Number of Observations: 90

Number of Groups: 4

> r_squareda <-r.squaredGLMM(modela)

> r_squareda

R2m R2c

[1,] 0.2512679 0.2733561

> modelb<-lme(body_mass~day, random = ~1|id, data = low)

> summary(modelb)

Linear mixed-effects model fit by REML

Data: low

AIC BIC logLik

-328.705 -317.0839 168.3525

Random effects:

Formula: ~1 | id

(Intercept) Residual

StdDev: 0.05976882 0.06103801

Fixed effects: body_mass ~ day

Value Std.Error DF t-value p-value

(Intercept) 0.6814380 0.020761907 126 32.82155 0.0000

day -0.0013673 0.000612556 126 -2.23219 0.0274

Correlation:

(Intr)

day -0.254

Standardized Within-Group Residuals:

Min Q1 Med Q3 Max

-1.95651420 -0.67308504 -0.04885059 0.45501870 3.34229247

Number of Observations: 137

Number of Groups: 10

> r_squared <- r.squaredGLMM(modelb)

Warning message:

'r.squaredGLMM' now calculates a revised statistic. See the help page.

> r_squared

R2m R2c

[1,] 0.02965535 0.5046344

how to interpret this output

ChatGPT

The output from r.squaredGLMM provides two R-squared values: R2m and R2c. These values are used to assess the proportion of variance explained by the fixed effects and the whole model, respectively, in the context of mixed-effects models.

Here's how to interpret these R-squared values:

R2m (Fixed Effects R-squared):

This value, 0.02965535, represents the proportion of variance explained by the fixed effects (the predictors in your model).

In other words, R2m tells you the percentage of variability in the response variable that is explained by the fixed effects alone.

R2c (Whole Model R-squared):

This value, 0.5046344, represents the proportion of variance explained by the entire model, including both fixed and random effects.

R2c tells you the percentage of variability in the response variable that is explained by both the fixed and random effects together.

> custom_colors1 <- c("black", "gray23", "gray35", "gray45", "gray", "darkgreen", "forestgreen", "olivedrab", "green", "lightgreen")

> ggplot(low, aes(x = day, y = body_mass, color = as.factor(id))) +geom_point() +geom_smooth(method = "lm", se = TRUE, aes (group = 1), color = "black") +scale_color_manual(values = custom_colors1) +labs(x = "Day", y = "Mass (g)", color = "Katydid ID") + theme_classic()+theme(text = element_text(family = "Times New Roman"))

> custom_colors <-c("forestgreen", "green", "gray", "black")

> ggplot(high, aes(x = day, y = body_mass, color = as.factor(id))) +geom_point() +geom_smooth(method = "lm", se = TRUE, aes (group = 1), color = "black") +scale_color_manual(values = custom_colors) +labs(x = "Day", y = "Mass (g)", color = "Katydid ID") + theme_classic()+theme(text = element_text(family = "Times New Roman"))
